# Supplementary material for: miR-874 regulates myocardial necrosis by targeting caspase-8
Source: PubMed Central journal article supplement — Cell Death Dis. 2013 Jul 4;4(7):e709–. doi: 10.1038/cddis.2013.233 (PMC3730407; doi:10.1038/cddis.2013.233), 2013-07-04

## Supplementary Figure Legends

### **Supplementary Figure 1. The expression levels of miRNAs in TNF $\alpha$ induced necrotic cell death in cardiomyocytes.**

**A.** Upregulated miRNAs upon TNF $\alpha$  treatment. Cardiomyocytes were treated with 10 ng/ml human TNF $\alpha$  for 24 hr. The expression levels of miRNAs were analyzed by qRT-PCR. **B.** qRT-PCR analysis of miR-874. Cardiomyocytes were treated with 10 ng/ml human TNF $\alpha$  at the indicated time, and the expression level of miR-874 was analyzed. \* $p$ <0.05 vs control.

### **Supplementary Figure 2. The RIPK1/RIPK3 is involved in H<sub>2</sub>O<sub>2</sub> induced necrotic cell death.**

**A and C.** The expression levels of RIPK1 or RIPK3 upon H<sub>2</sub>O<sub>2</sub> treatment. Cardiomyocytes were treated with H<sub>2</sub>O<sub>2</sub> at the indicated time, and the expression of RIPK1 or RIPK3 was analyzed by western blot. **B and D.** Knockdown of RIPK1 or RIPK3 can attenuate H<sub>2</sub>O<sub>2</sub> induced necrotic cell death. Cardiomyocytes were infected with adenovirus RIPK1-siRNA (B) or RIPK3-siRNA (D) and their scramble form (RIPK1-sc or RIPK3-sc), then exposed to H<sub>2</sub>O<sub>2</sub>. Cells were harvested at 48h after treatment for the analysis of RIPK1 or RIPK3 levels and PI exclusion. \* $p$ <0.05 vs H<sub>2</sub>O<sub>2</sub> alone.

### **Supplementary Figure 3. Foxo3a KO mice exhibit increased I/R injury.**

WT and Foxo3a KO mice were subjected to I/R as described in methods. **A.** Caspase-8 level were analyzed by western blot. **B.** Foxo3a KO mice increased myocardial infarction

upon I/R. \* $p < 0.05$  vs WT+I/R. C. SDS-soluble lysates were immunoblotted with antibody specific for the N-terminus of CYLD; the unprocessed CYLDp107 and the CYLDp25 cleavage product generated from the endogenous CYLD protein were shown.

Supplementary Figure 1

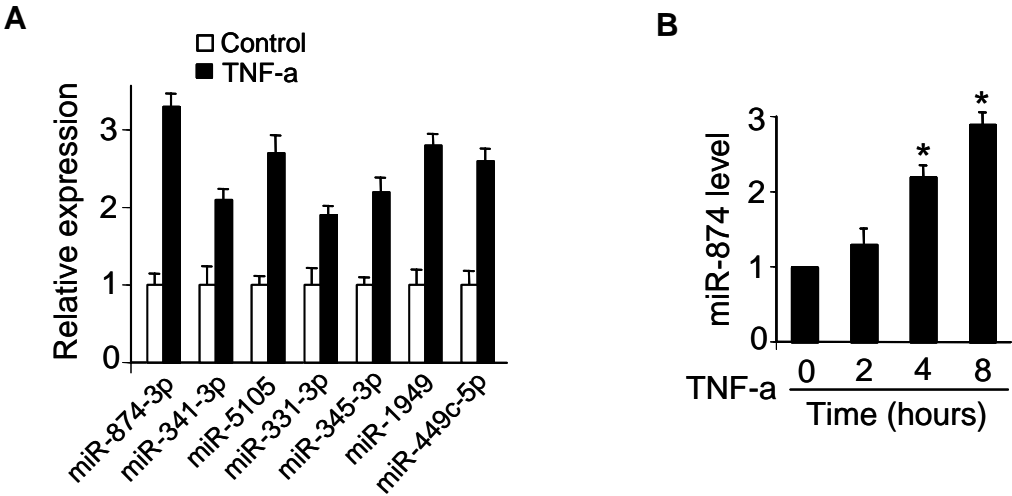

Supplementary Figure 2

**A**

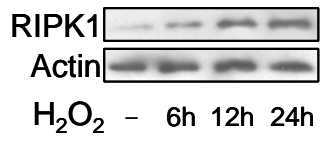

**B**

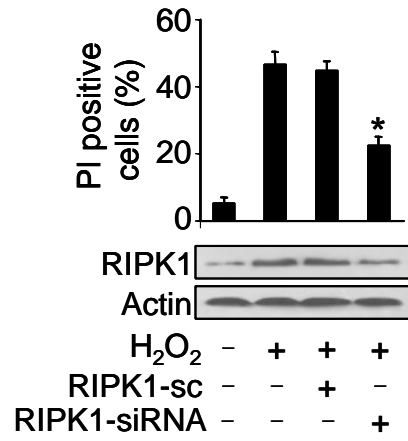

**C**

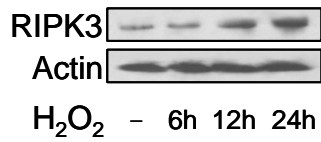

**D**

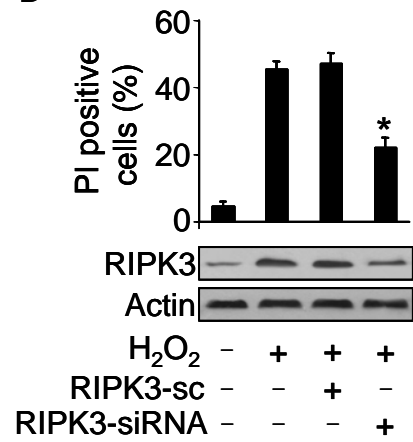

Supplementary Figure 3

**A**

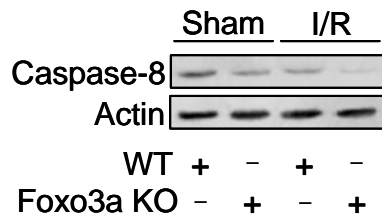

**B**

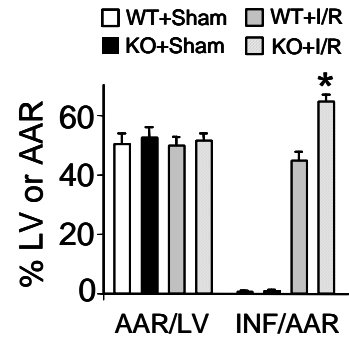

**C**

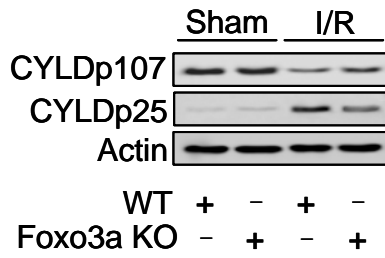

Supplement: cddis2013233x1.pdf [file cddis2013233x1.pdf]
