# Supplementary material for: miR-874 regulates myocardial necrosis by targeting caspase-8
Source: PubMed Central journal article supplement — Cell Death Dis. 2013 Jul 4;4(7):e709–. doi: 10.1038/cddis.2013.233 (PMC3730407; doi:10.1038/cddis.2013.233), 2013-07-04
Supplement: cddis2013233x2.pdf [file cddis2013233x2.pdf]

**Table S1. Microarray analysis of miRNAs**

| <b>miR-name</b>     | <b>Fold change<br/>(H2O2/control)</b> | <b>p-value</b> |
|---------------------|---------------------------------------|----------------|
| Upregulated genes   |                                       |                |
| mmu-miR-874-3p      | 3.210                                 | 5.98E-56       |
| mmu-miR-341-3p      | 2.639                                 | 1.15E-44       |
| mmu-miR-5105        | 2.557                                 | 1.50e-05       |
| mmu-miR-331-3p      | 2.503                                 | 1.88E-95       |
| mmu-miR-345-3p      | 2.373                                 | 6.21E-129      |
| mmu-miR-1949        | 2.246                                 | 0.00033272     |
| mmu-miR-449c-5p     | 2.019                                 | 3.24E-06       |
| mmu-miR-5115        | 1.925                                 | 3.35E-09       |
| mmu-miR-542-5p      | 1.869                                 | 7.02E-62       |
| mmu-miR-5109        | 1.801                                 | 8.56E-151      |
| mmu-miR-148b-5p     | 1.799                                 | 0.00363019     |
| mmu-miR-181a-5p     | 1.663                                 | 0              |
| Downregulated genes |                                       |                |
| mmu-miR-376b-3p     | -1.535                                | 0.006989787    |
| mmu-miR-399b-3p     | -1.554                                | 1.07E-76       |
| mmu-miR-412-3p      | -1.728                                | 0.003344321    |
| mmu-miR-3068-3p     | -1.754                                | 6.93E-32       |
